# Supplementary material
Source: PubMed Central journal article supplement (PMC3073722)
Supplement: NIHMS280265-supplement-supplement_1.pdf [file NIHMS280265-supplement-supplement_1.pdf]

**Supplementary Table 1: Relationship between quality of life and psychological distress and manifestation of reflux disease, stratified by patient gender**

| Measure<br>(mean ± SD)                    | Male                     |                     |                        |      | Female                   |                     |                       |      |
|-------------------------------------------|--------------------------|---------------------|------------------------|------|--------------------------|---------------------|-----------------------|------|
|                                           | Non-erosive<br>(n = 105) | Erosive<br>(n = 42) | Barrett's<br>(n = 112) | p*   | Non-erosive<br>(n = 184) | Erosive<br>(n = 30) | Barrett's<br>(n = 56) | p*   |
| GERD-HRQL <sup>†</sup><br>Unknown (n)     | 18.1 ± 11.1<br>24        | 16.1 ± 11.8<br>10   | 13.5 ± 10.9<br>28      | 0.03 | 17.9 ± 11.3<br>48        | 15.7 ± 9.5<br>7     | 14.3 ± 9.7<br>17      | 0.15 |
| SF-36 PCS <sup>#</sup><br>Unknown (n)     | 43.8 ± 12.1<br>54        | 43.8 ± 11.1<br>7    | 42.8 ± 13.3<br>39      | 0.87 | 38.3 ± 12.6<br>50        | 37.0 ± 13.4<br>5    | 40.3 ± 11.8<br>10     | 0.51 |
| SF-36 MCS <sup>**</sup><br>Unknown (n)    | 49.6 ± 10.0<br>54        | 50.3 ± 9.9<br>7     | 52.9 ± 10.0<br>39      | 0.15 | 47.7 ± 11.4<br>50        | 46.0 ± 13.6<br>5    | 49.9 ± 12.0<br>10     | 0.37 |
| GIQLI <sup>‡</sup><br>Unknown (n)         | 129.7 ± 23.7<br>42       | 133.5 ± 21.0<br>8   | 140.6 ± 19.7<br>40     | 0.01 | 121.7 ± 24.0<br>55       | 127.3 ± 20.4<br>7   | 131.6 ± 22.3<br>12    | 0.04 |
| SCL-90-R GSI <sup>††</sup><br>Unknown (n) | 57.8 ± 11.7<br>40        | 57.6 ± 11.2<br>7    | 56.6 ± 11.9<br>35      | 0.83 | 58.1 ± 11.4<br>44        | 58.6 ± 13.8<br>5    | 56.1 ± 11.6<br>35     | 0.55 |

\* p value within gender strata calculated with ANOVA; p values between gender strata calculated with t-test are as follows:

GERD severity: Male vs female non-erosive, p = 0.92; erosive p = 0.91; BE p = 0.72

SF-36 PCS: Male vs female non-erosive, p = 0.74; erosive p = 0.04; BE p = 0.31

SF-36 MCS: Male vs female non-erosive, p = 0.28; erosive p = 0.16; BE p = 0.15

GIQLI: Male vs female non-erosive, p = 0.03; erosive p = 0.28; BE p = 0.02

SCL-90 GSI: Male vs female non-erosive, p = 0.83; erosive p = 0.75; BE p = 0.82

<sup>†</sup> GERD severity based upon 10-question GERD-HRQL. Higher scores indicate more severe symptomatology

<sup>‡</sup> GIQLI = Gastrointestinal Quality of Life Index. Lower scores indicate more severe symptoms.

<sup>#</sup> SF-36 PCS and MCS = Physical and mental component summary score from the Medical Outcomes Study Short-Form 36. Lower scores indicate lower quality of life.
